# Supplementary material for: Sex and estrous cycle influence fasting-induced torpor via hypothalamic estrogen signalling
Source: Research Square preprint supplement (doi:10.21203/rs.3.rs-7356338/v1), 2025-08-18
Supplement: Supplementary file 1 [file fcbac7018d1eb5a3800b4760.docx]

**Supplementary Figure 1. Vaginal cytology across the estrous cycle.** Example micrographs showing the vaginal cytology samples collected in each animal during the diestrus, proestrus and estrus phases of the estrous cycle.
